# Supplementary material
Source: PubMed Central journal article supplement (PMC5581297)

# Supplementary Figure 2

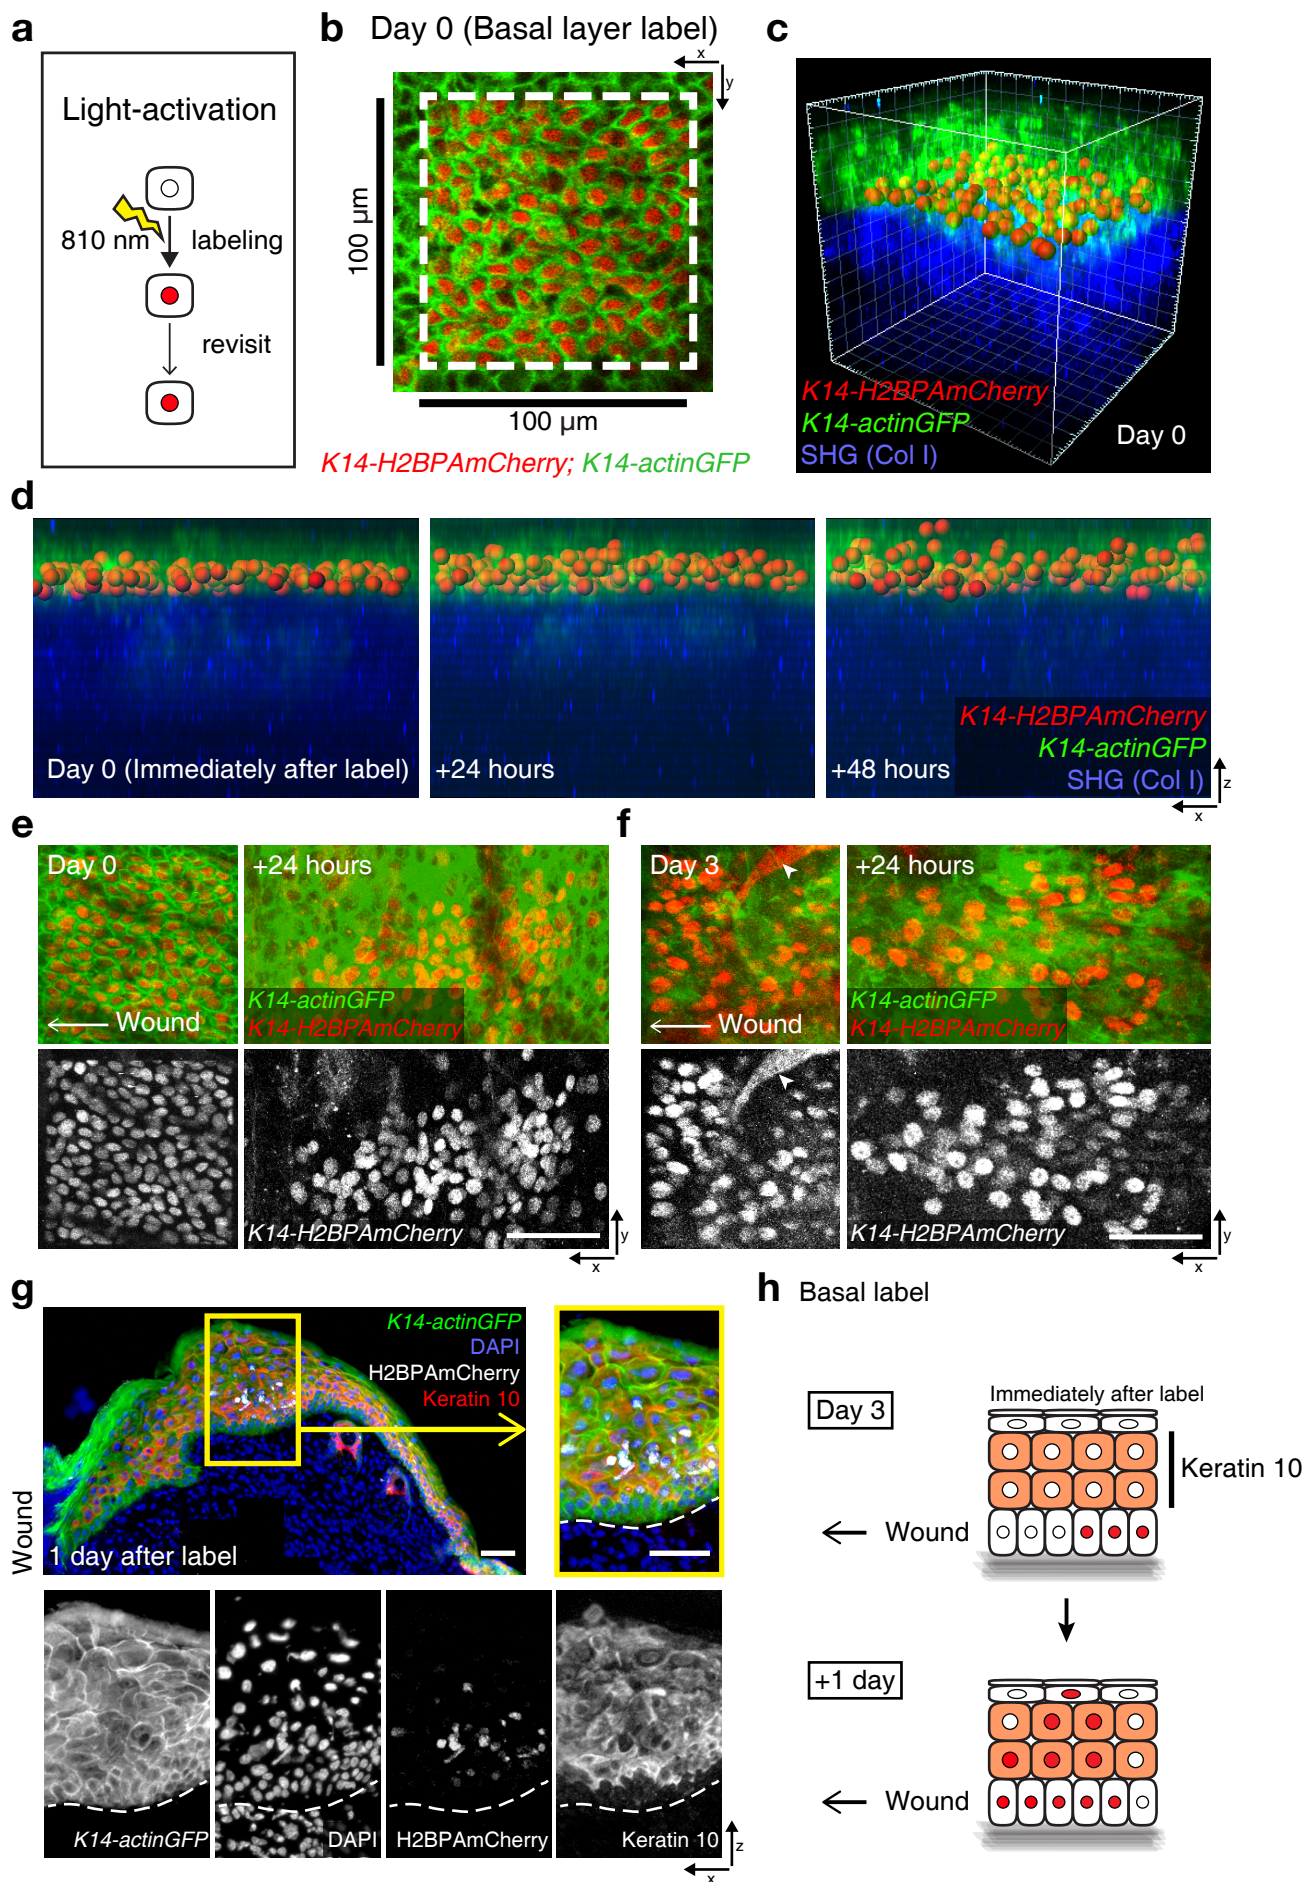

Supplement: NIHMS843532-supplement-3.pdf [file NIHMS843532-supplement-3.pdf]
